# Supplementary material
Source: Springer Nature journal article supplement (https://www.springermedizin.de/resource/supplementary/12916_2013_849_MOESM8_ESM.pdf/9598470)
Supplement: MOESM8 [file 9598470]

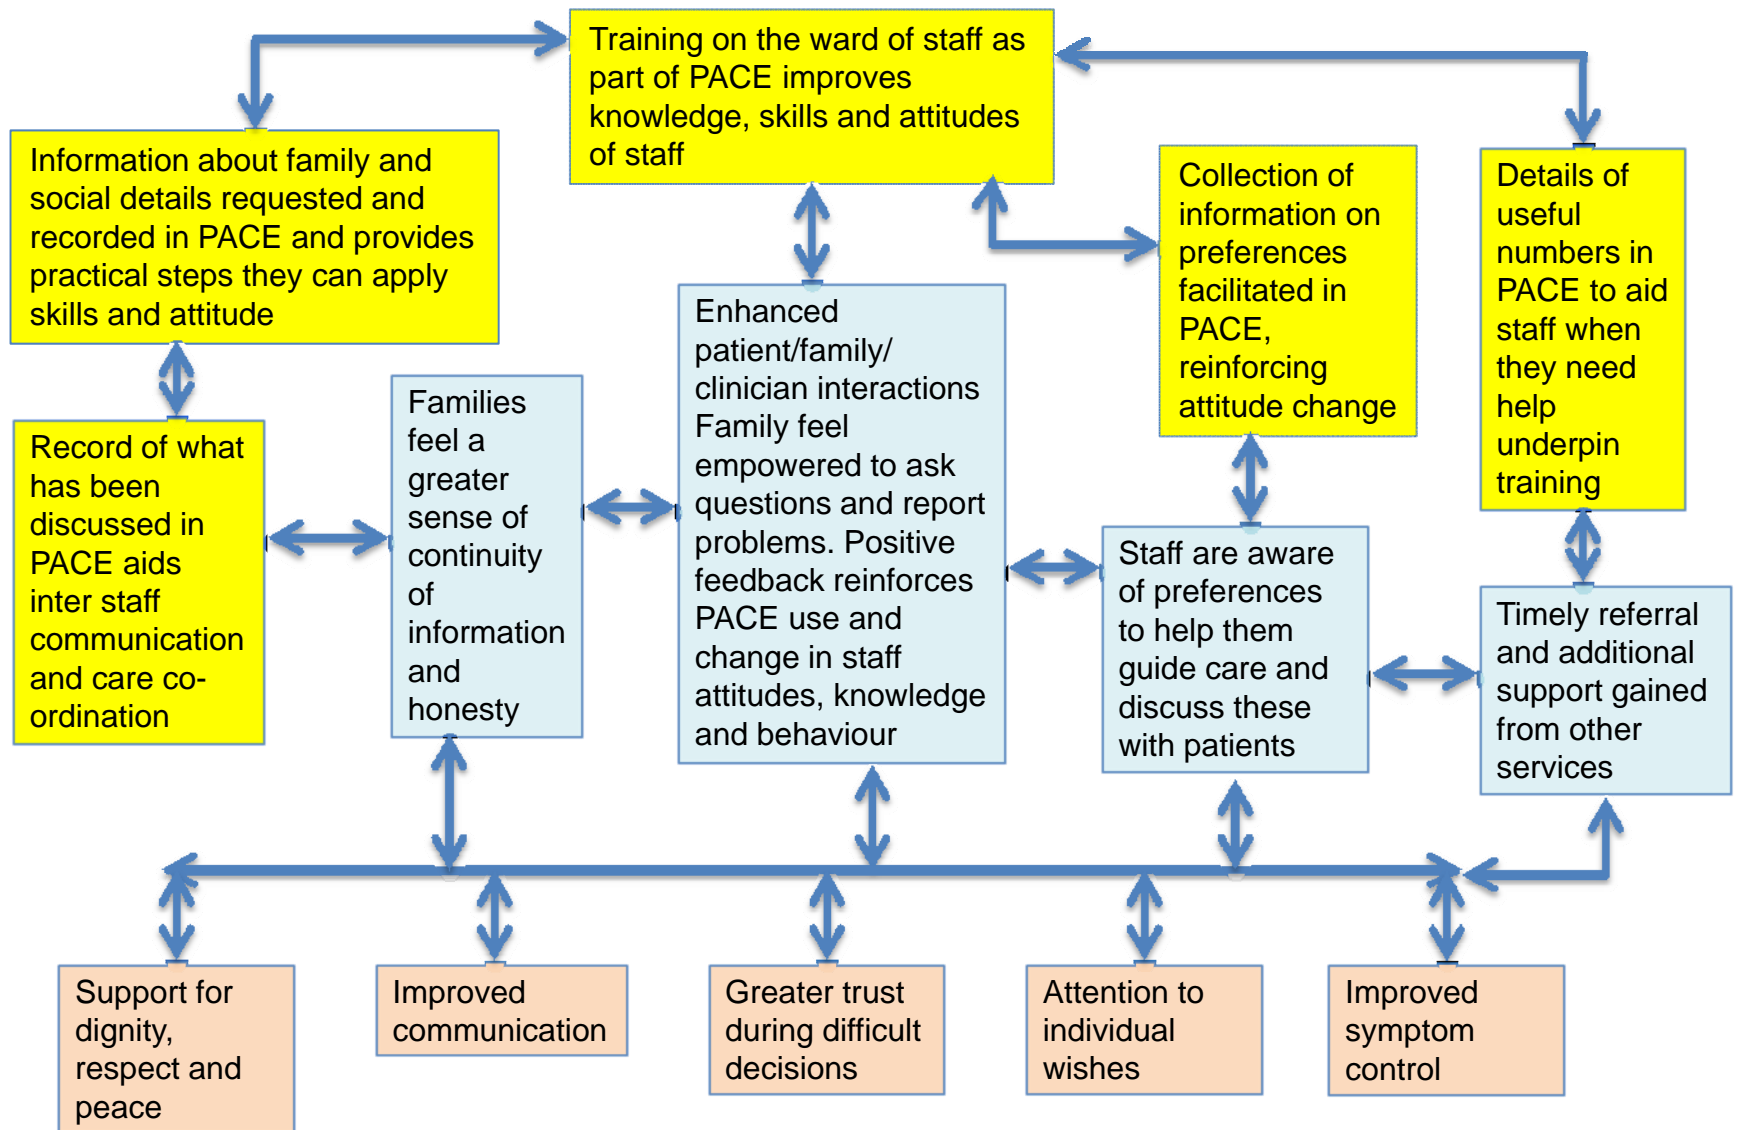

### Legend

PACE action

Action/ intermediate outcome prompted by PACE action

Patient/family outcome
